# Supplementary material for: Proteotranscriptomics assisted gene annotation and spatial proteomics of Bombyx mori BmN4 cell line
Source: PubMed Central journal article supplement (PMC7541253; doi:10.1186/s12864-020-07088-7), 2020-10-06
Supplement: 12864_2020_7088_MOESM1_ESM.pdf [file 12864_2020_7088_MOESM1_ESM.pdf]

## **Additional File 1**

### **Proteotranscriptomics assisted gene annotation and spatial proteomics of the lepidopteran model species *Bombyx mori***

Michal Levin\*, Marion Scheibe and Falk Butter\*

Institute of Molecular Biology (IMB), Ackermannweg 4, 55128 Mainz, Germany

*To whom correspondence should be addressed:* [m.levin@imb.de](mailto:m.levin@imb.de) or [f.butter@imb.de](mailto:f.butter@imb.de)

### **Supplemental Figures:**

**Supplemental Figure S1:** Distribution of length distributions across RNA expression level bins

**Supplemental Figure S2:** Comparison of Transrate assembly scores to other publicly available assemblies

**Supplemental Figure S3:** Overall MS detected transcripts show improved assembly features

**Supplemental Figure S4:** RNA-Seq coverage assay for the detection of falsely split genes

**Supplemental Figure S5:** Densityplot of deviations from SilkBase annotation for longer annotated genes

**Supplemental Figure S6:** Intracluster distances of SOM clusters can be used to filter out clusters that have high variability within the cluster

**Supplemental Figure S7:** Depiction of expression profiles of all genes separated into respective clusters

**Supplemental Figure S8:** Comparison of fractionation profiles of the respective cellular compartments in original LOPIT-DC TMT data and our Proteotranscriptomics LC-MS-MS approach

**Supplemental Figure S9:** Comparison of fractionation profiles of orthologs of established *Drosophila melanogaster* cellular compartment markers to the mean dynamics determined by SOM clustering and enrichment analysis

**Supplemental Figure S10:** Comparison of LFQ expression levels of detected protein groups that are shorter (small proteins) or longer than 20 amino acids

### **Supplemental Tables:**

**Supplemental Table S1:** Read representation statistics of the Trinity assembly

**Supplemental Table S2:** Expression bins and transcript lengths

**Supplemental Table S3:** TransRate analysis results

**Supplemental Table S4:** BUSCO analysis results

**Supplemental Table S5:** *Bombyx mori* NCBI and SilkBase based BmN4 variome

**Supplemental Table S6:** Statistics of correspondence and differences between genome-free and SilkBase annotations

**Supplemental Table S7:** Table including enrichment values for all clusters and all cellular localization categories

**Supplemental Table S8:** Mycoplasma contamination assay

**Supplemental Table S9:** Comparison of genome-free and genome-guided assembly

**Supplemental Table S10.** Mapping statistics of newly identified protein CDS sequences to the sequences of the female-determining chromosome W

## Supplemental Figures

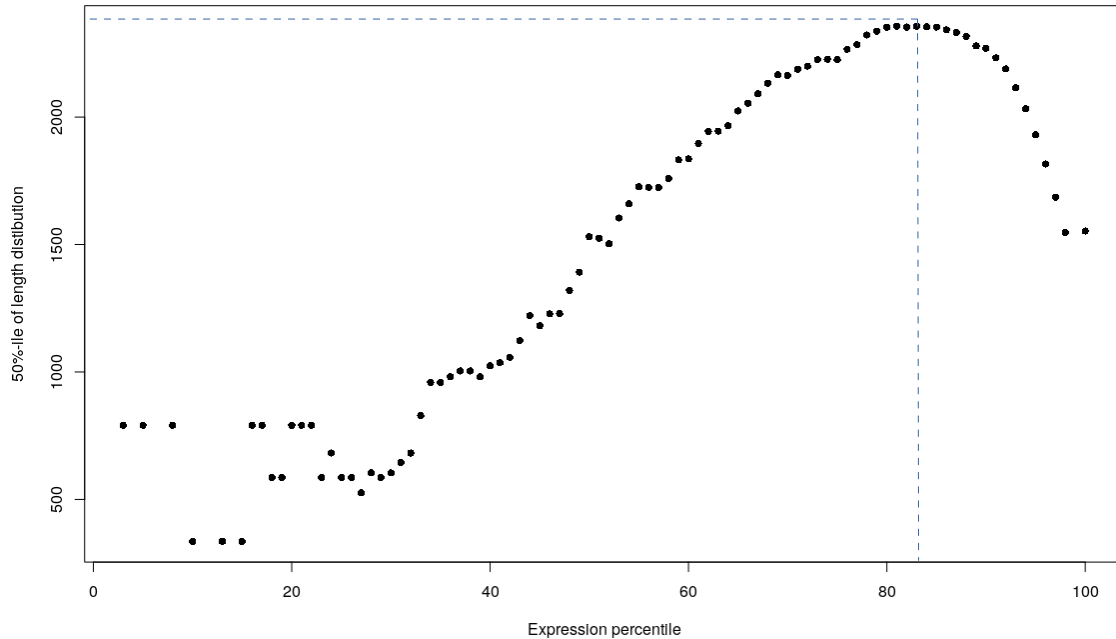

**Supplemental Figure S1: Distribution of length distributions across RNA expression level bins.** Trinity transcripts lengths (nt) peak at around the 80<sup>th</sup> percentile of expression levels of all individual transcripts (indicated by blue dotted line).

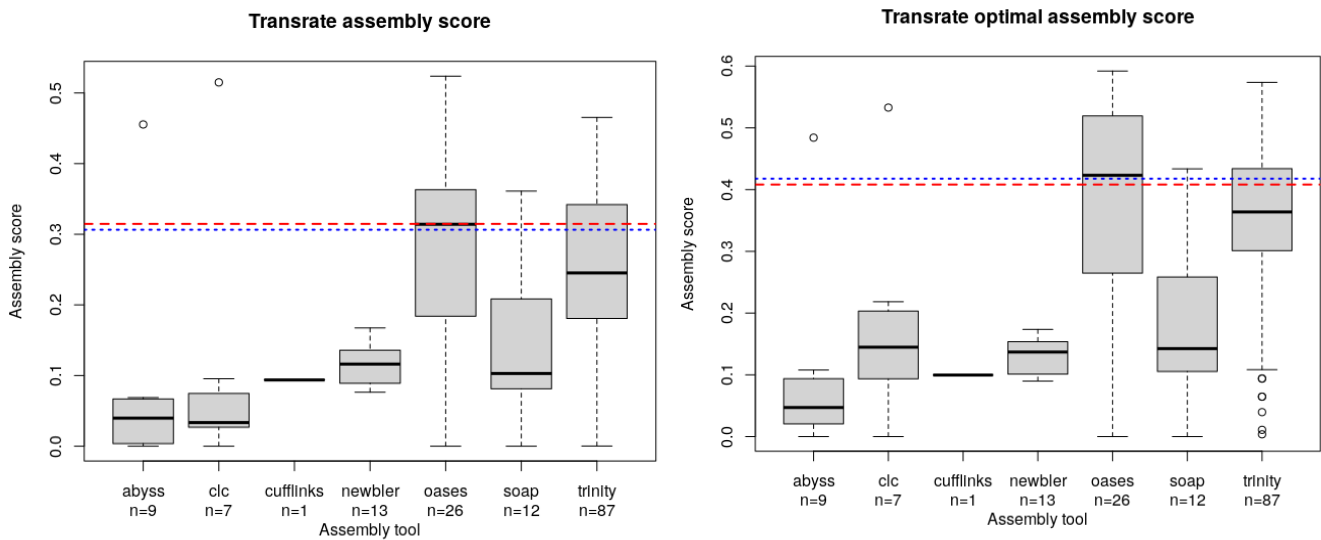

**Supplemental Figure S2: Comparison of Transrate assembly scores to other publicly available assemblies.** Transrate assembly scores of 255 assemblies analyzed by (Smith-Unna et al., 2016). Blue dotted horizontal lines mark the 70<sup>th</sup> percentile of the assembly or optimal assembly scores of all assemblies analyzed. Red dotted horizontal lines indicate the assembly or optimal assembly score of our trinity assembly.

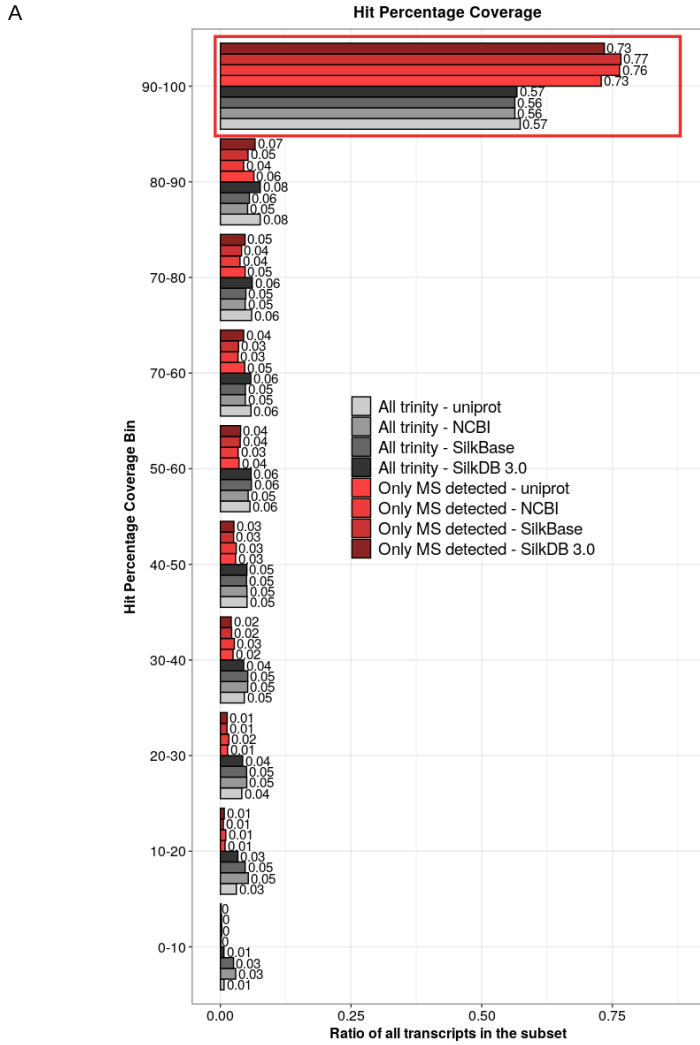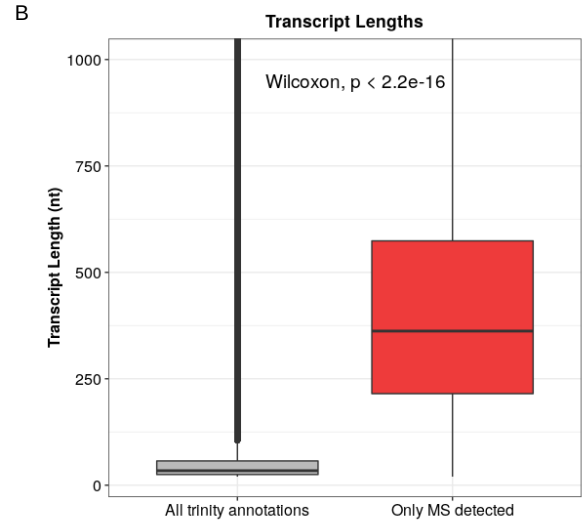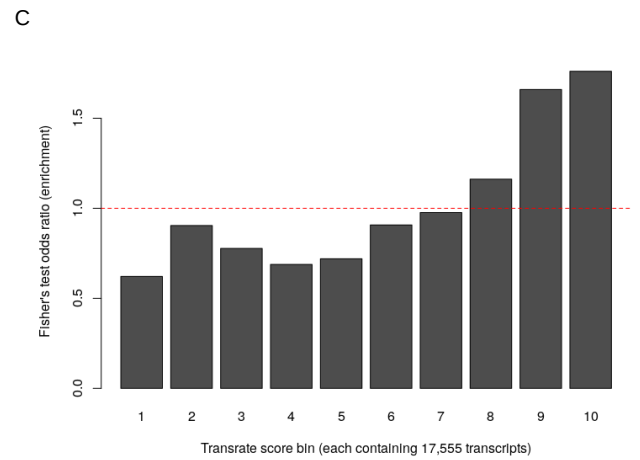

**Supplemental Figure S3: Overall MS detected transcripts show improved assembly features.**

(A) Barplot of hit percentage coverage bin of all transdecoder predictions and predictions that were detected by MS compared to current *Bombyx mori* annotations. (B) Boxplot of transcript lengths of all transdecoder predictions (grey) and predictions that were detected by mass spectrometry (MS) (red). (C) Barplot of mass spectrometric identification enrichment metrics across TransRate score bins. The plot shows that contigs with high TransRate scores tend to also be detected by mass spectrometry.

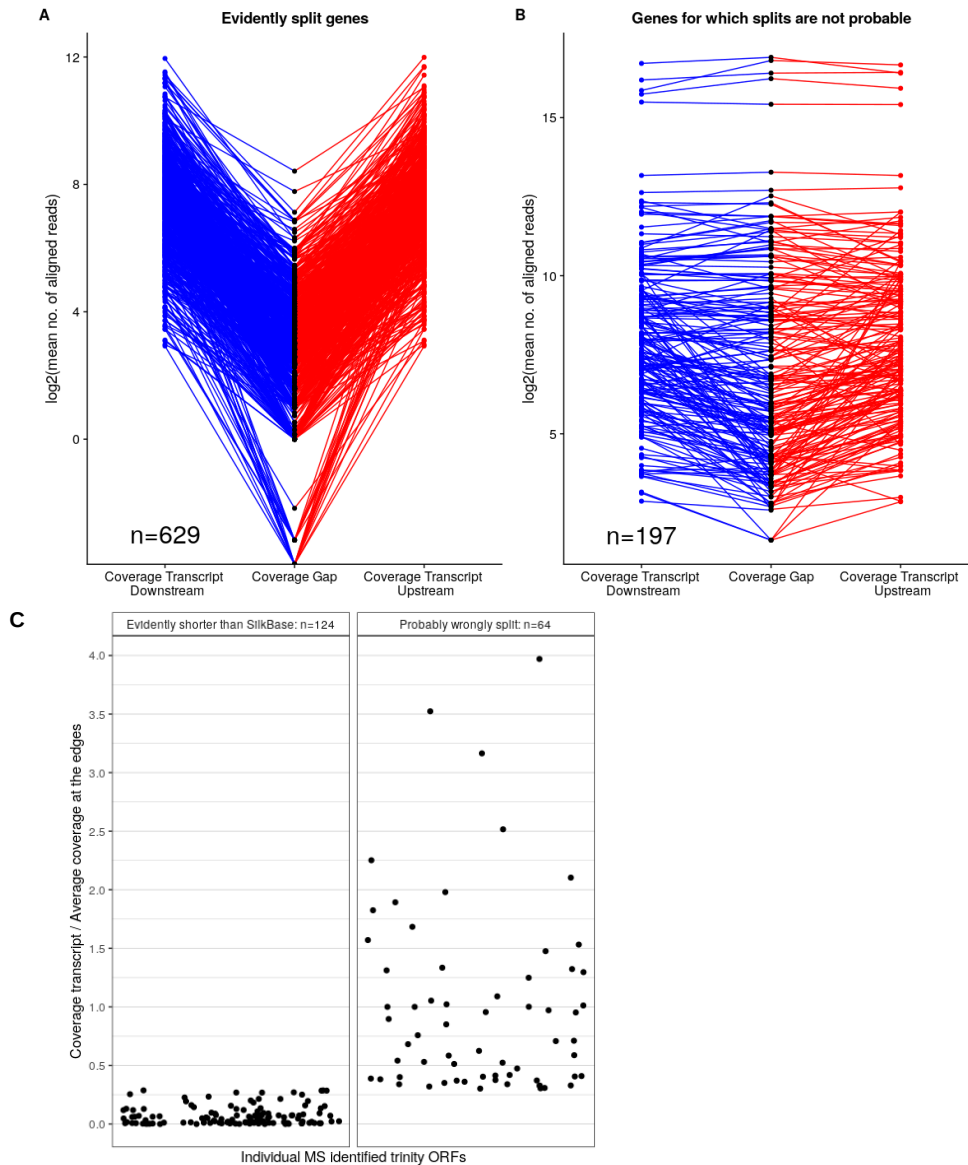

**Supplemental Figure S4: RNA-Seq coverage assay for the detection of falsely split genes.** For all SilkBase genes that were represented by split genes in the Trinity annotation the coverage for each transcript in the relevant paired transcripts (Transcript downstream and upstream – blue and red colored dots, respectively) and the gap between these (black colored dots) was calculated from mapped RNA-Seq paired reads. Blue and red lines indicate the change in coverage between downstream or upstream transcript and gap region, respectively. In general, one can distinguish two groups. (A) Transcripts that show a clear drop in coverage in the gap between the transcripts of interest and hence are most probably real splits. (B) Transcripts that show no significant drop in coverage in the gap region and hence could have in principle been falsely split in our approach. (C) 188 genes were found to be shorter than 85% compared to their SilkBase counterparts. 124 show a clear drop in the read coverage at the edges of the transcript (<30% of the gene body coverage), 64 don't show a decrease and are possibly falsely split).

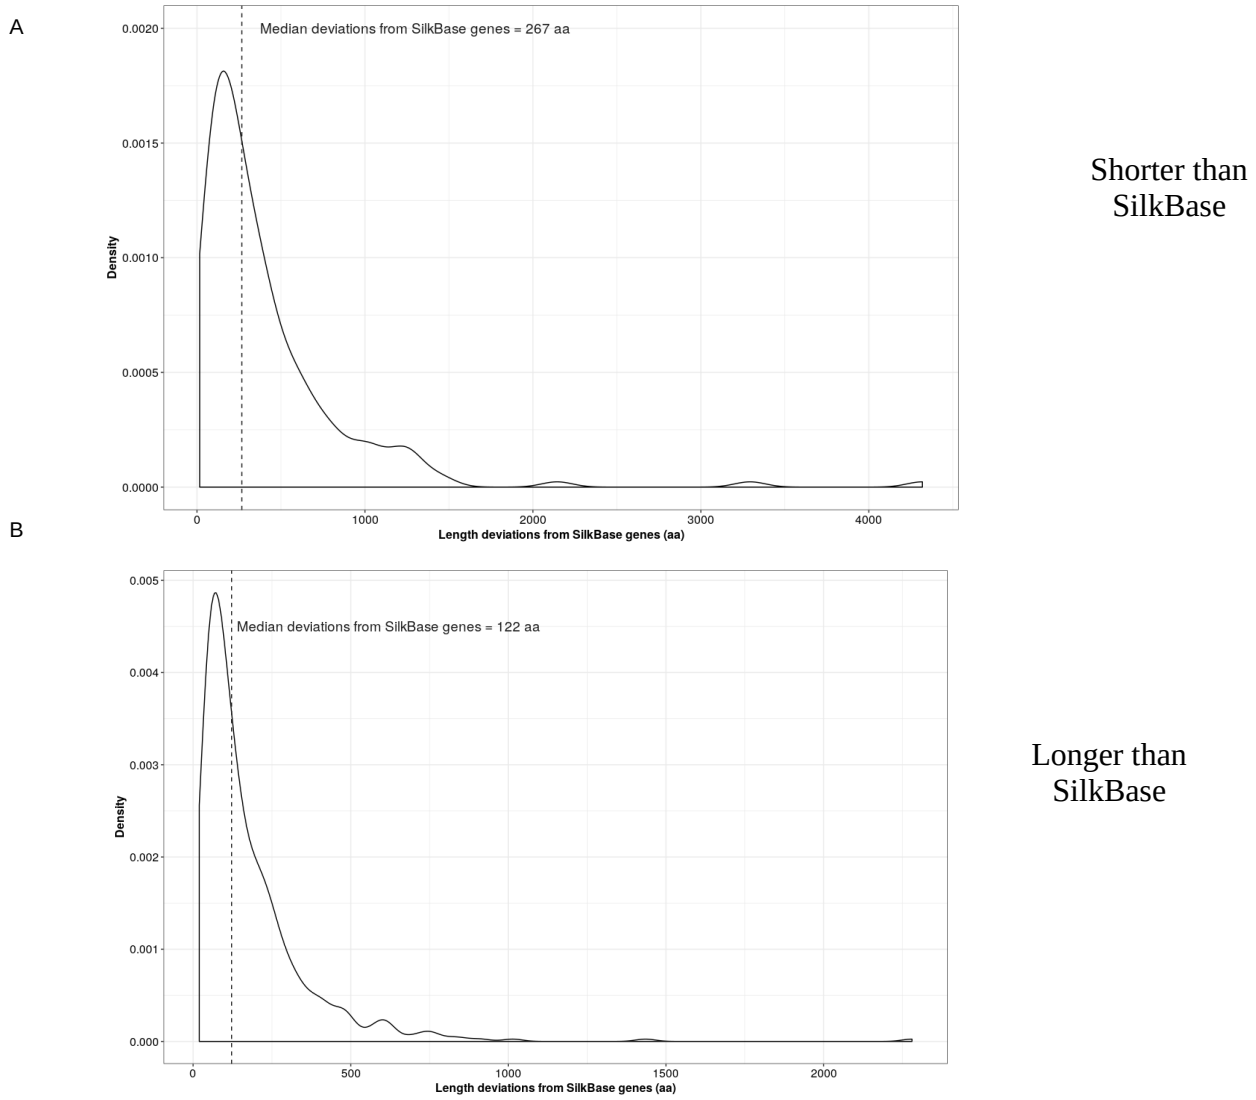

**Supplemental Figure S5:** Density plots describing the deviations of the protein lengths (amino acid residues) of MS detected Trinity assembled proteins from the lengths of associated SilkBase annotated proteins for proteins that have been identified to have (A) shorter assembled proteins (188 proteins in total) or (B) longer assembled proteins (513 proteins in total)

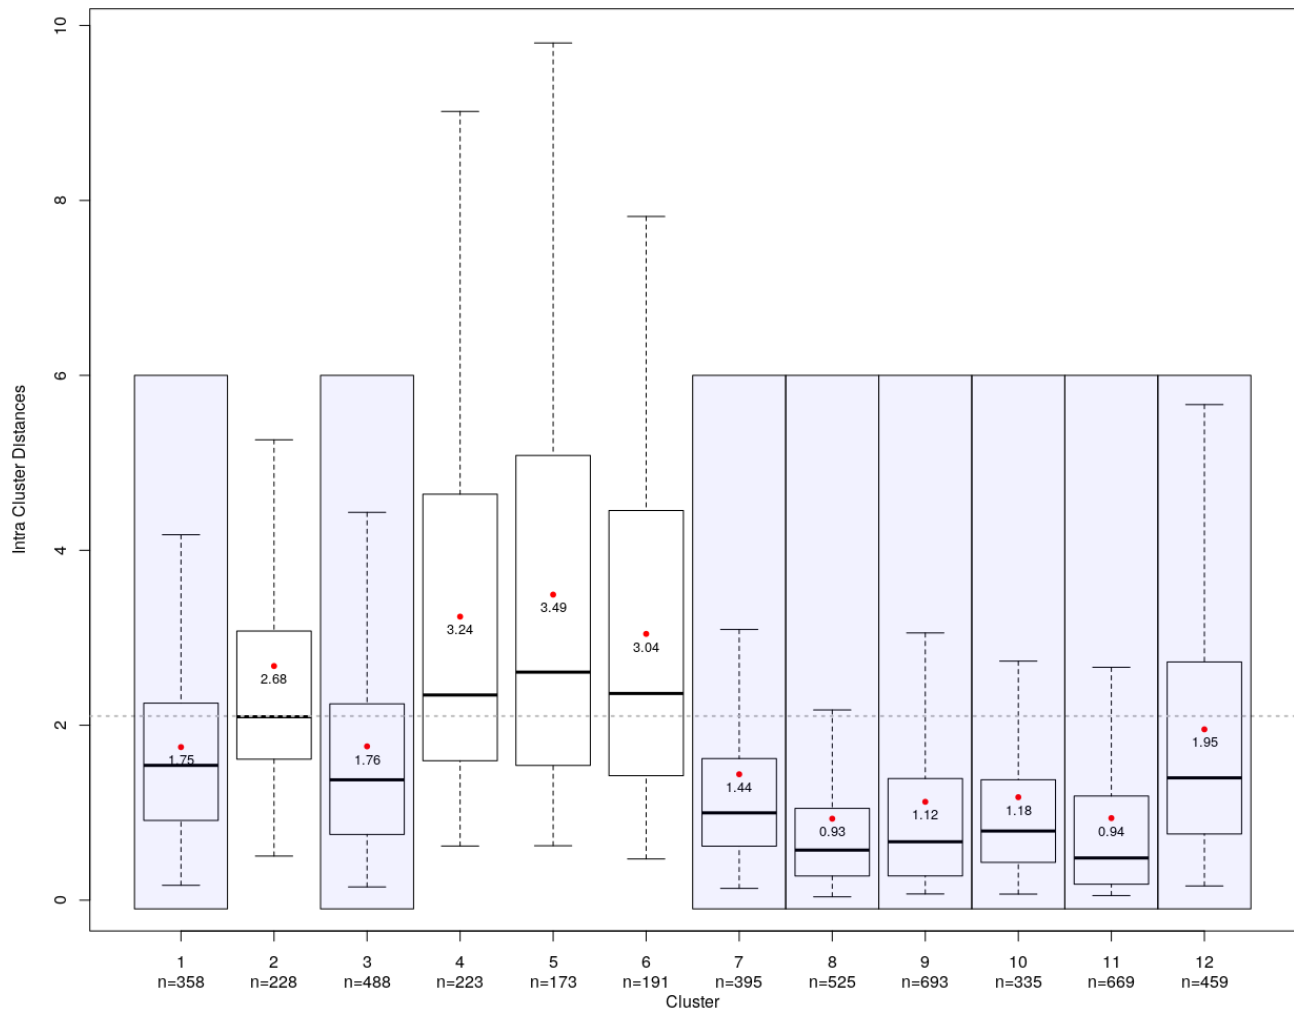

**Supplemental Figure S6: Intracluster distances of SOM clusters can be used to filter out clusters that have high variability within the cluster (see Figure 4A).** Boxplot summarizing the intra-cluster distances between fractionation profiles. For final analyses only clusters with mean intra-cluster distances (red dots and value shown) below the 75%-tile of all intra-cluster distances were kept (blue boxes). All others were combined into one cluster of uncategorized profiles (colored in gray in Fig. 4A).

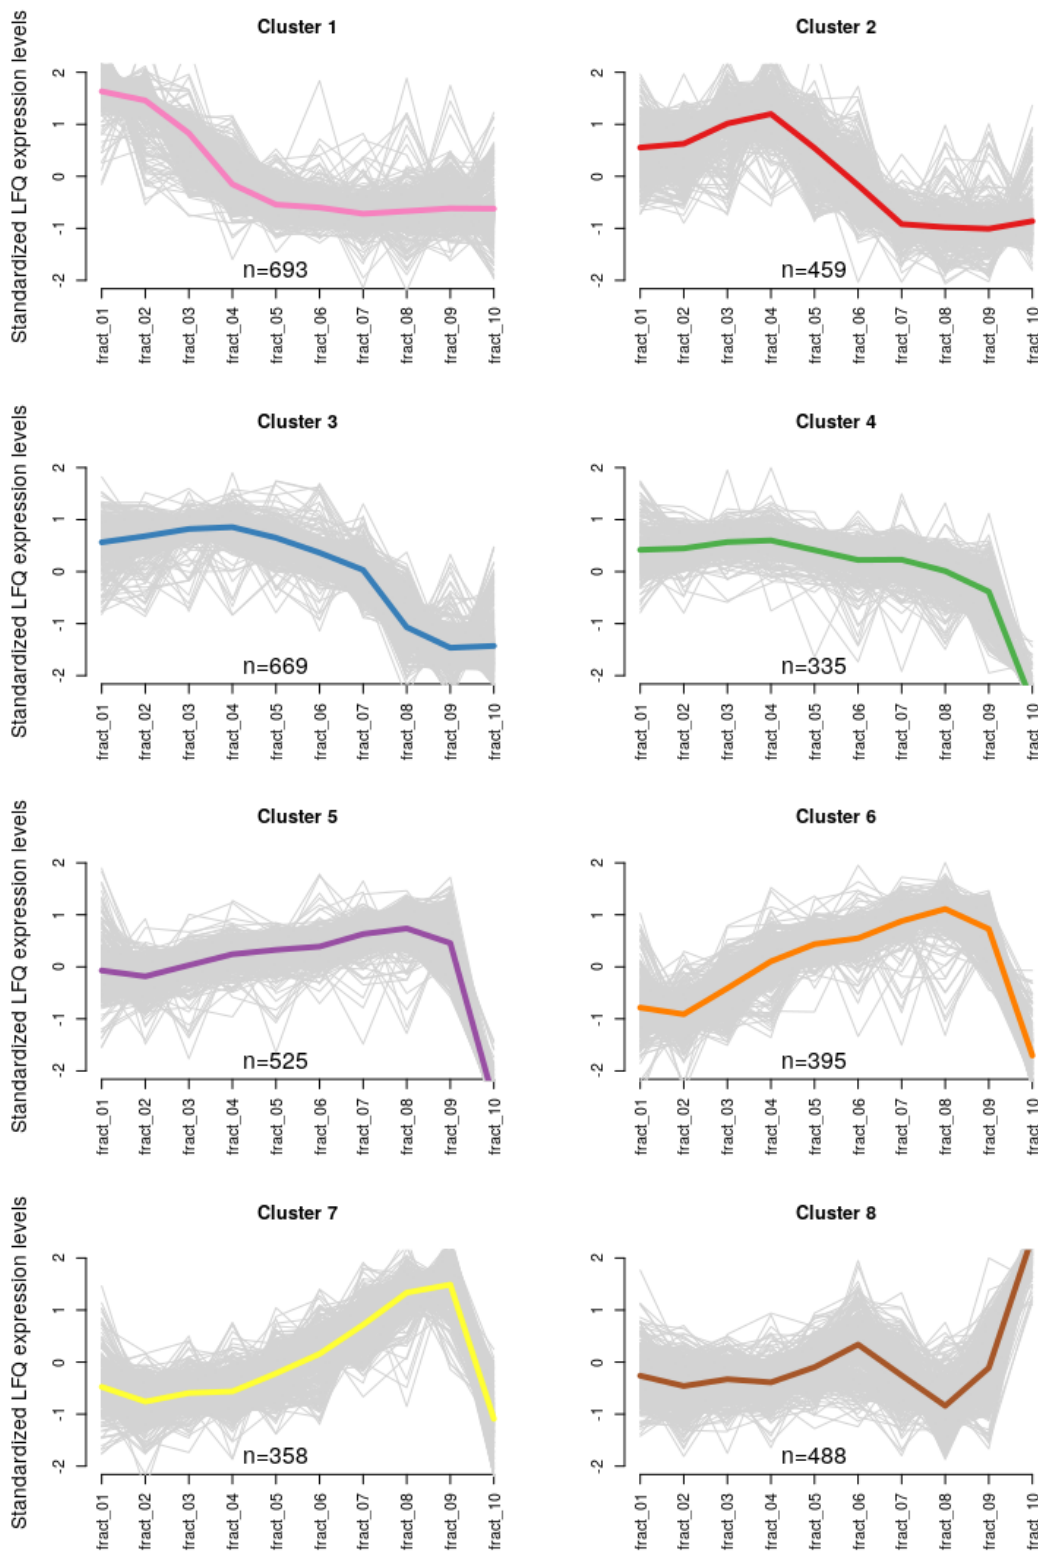

**Supplemental Figure S7: Depiction of expression profiles of all genes separated into respective clusters (see Figure 4B).** Individual standardized gene expression and average profiles across the fractionation series are depicted in thin gray and thick colored lines, respectively. Color code is the same as in Figure 4.



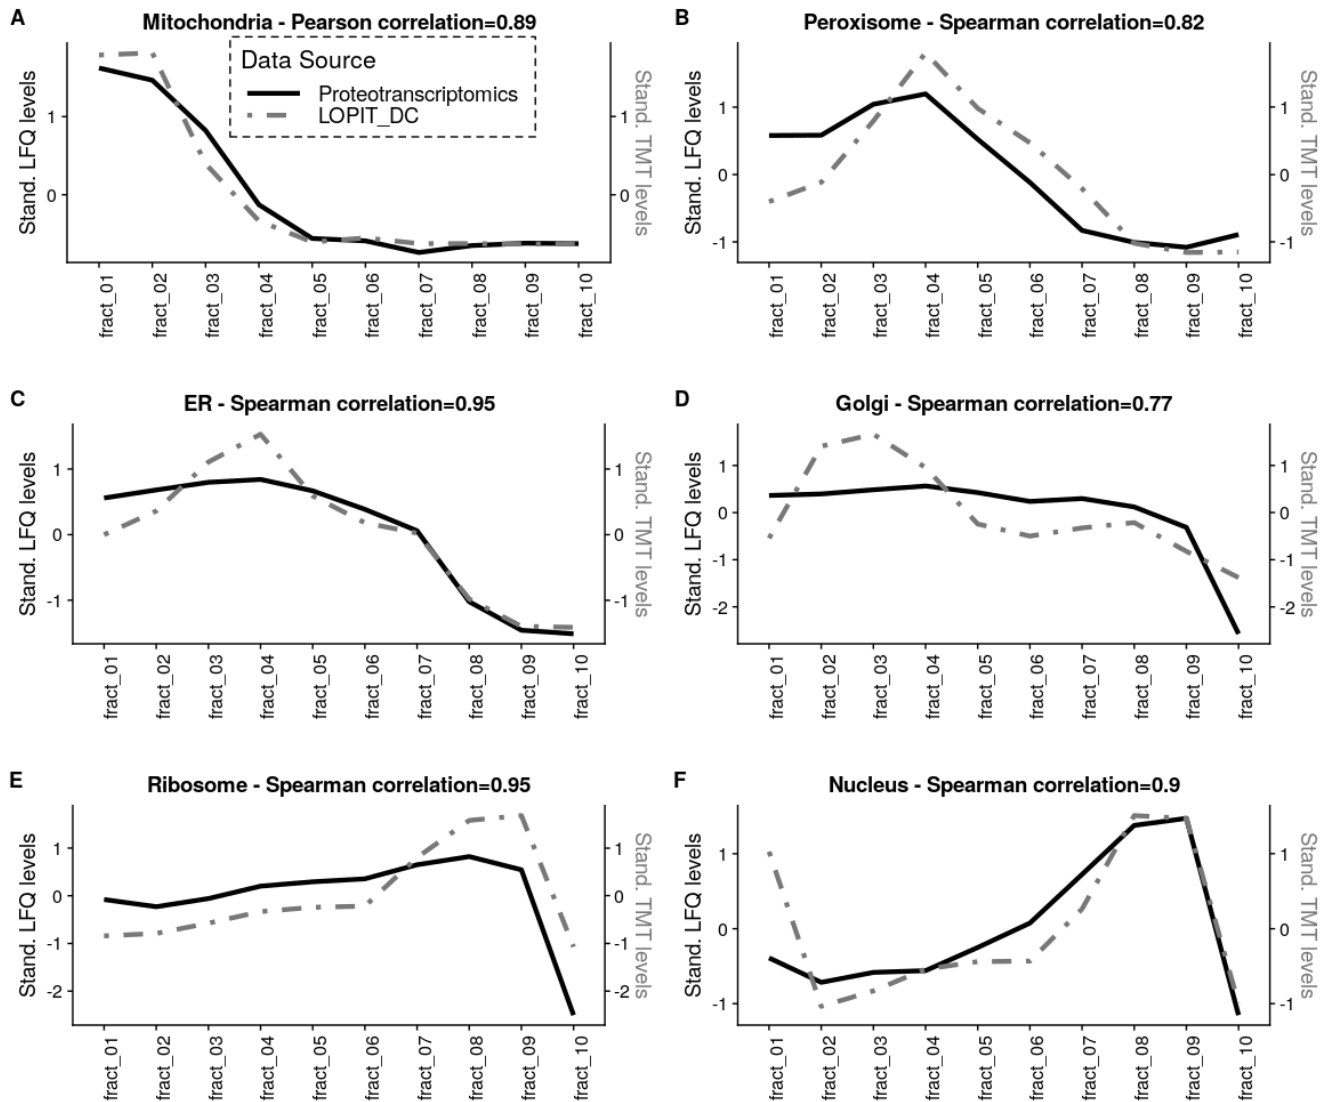

**Supplemental Figure S8: Comparison of fractionation profiles of the respective cellular compartments show high correspondence between original LOPIT-DC TMT data and our Proteotranscriptomics LC-MS-MS approach.** The black solid and the gray dashed line show the standardized mean Lfq levels from *Bombyx mori* BmN4 cells and the standardized mean TMT levels from human osteosarcoma U-2 OS cells of the respective clusters across fractions, respectively. Spearman correlation between the two experiments is indicated for each compartment in the title of the respective figure.

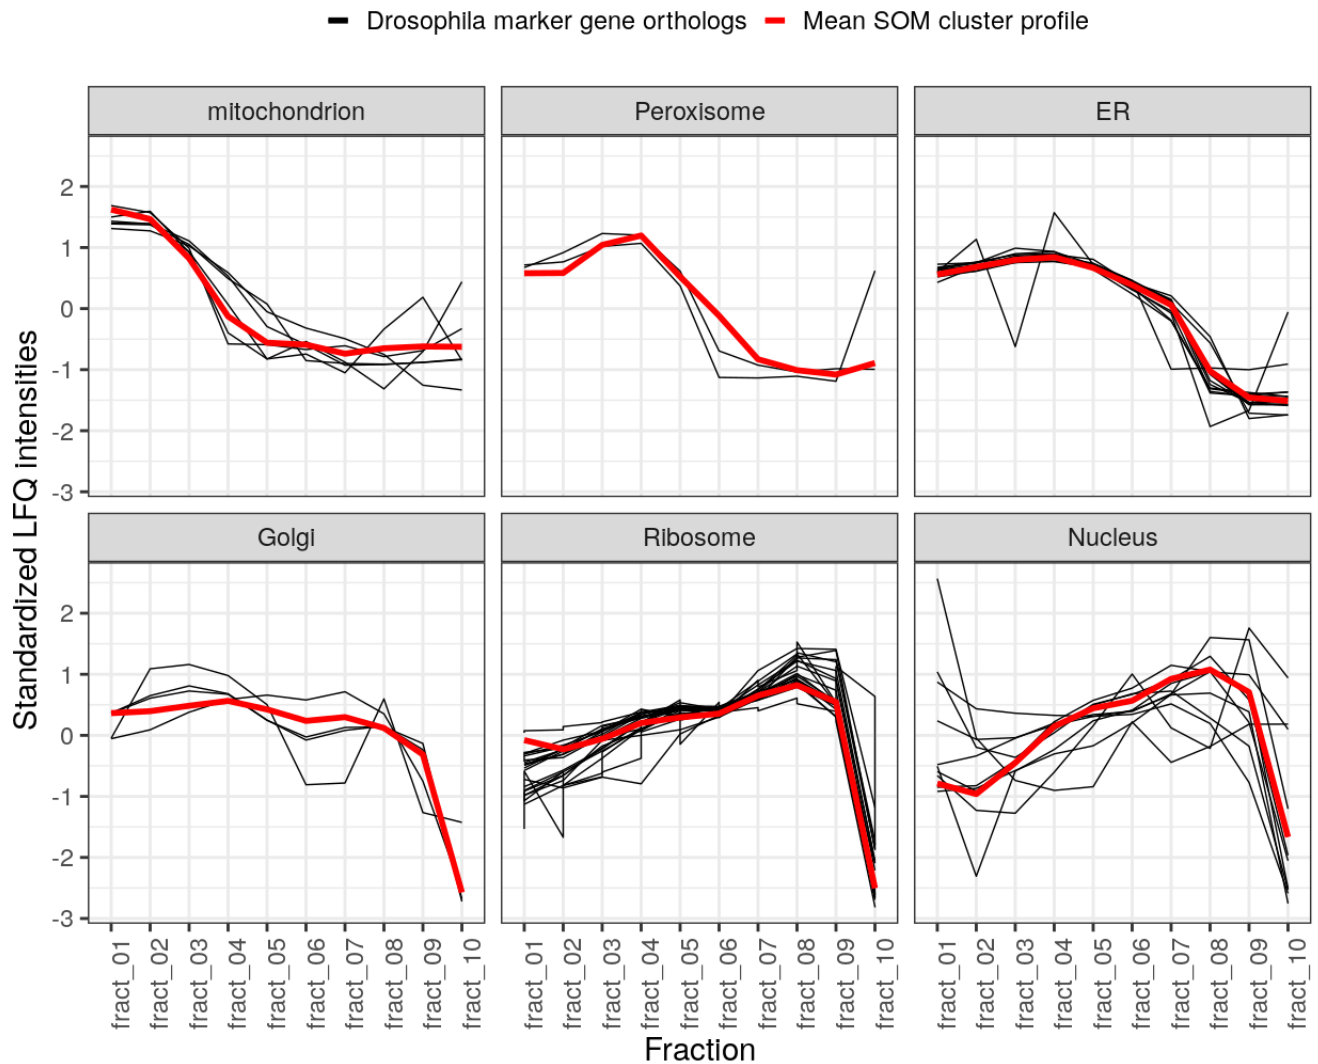

**Supplemental Figure S9: Comparison of fractionation profiles of orthologs of established *Drosophila melanogaster* cellular compartment markers to the mean dynamics determined by SOM clustering and enrichment analysis show high correspondence.** The black solid lines show the standardized LFQ levels of orthologous genes from *Bombyx mori* BmN4 cells. The thick red line shows standardized mean LFQ levels of the respective clusters as established in Figure 4B. *Drosophila* marker genes for cellular compartments were retrieved from pRoloc bioconductor package (PMID: 24413670), orthology was established using blastp. **ER:** Q8T9B6, Q8STG9, Q9VUZ0, Q9U5L1, Q24319, Q9VIU7, Q8T045, Q09332, O18405, Q9VSU7, Q9VSN9, Q7KLX3, Q7K110. **Golgi:** Q9VR90, Q6WV19, Q6WV17, Q9VYV5. **Mitochondrion:** Q9VEJ0, P35381, Q9VSR5, Q9VIE8, Q95RF6, Q94516. **Nucleus:** O44437, Q24492, Q8IPX7, P27864, P15348, Q9W1V3, Q9V3E7, P41073, A1Z8U0, A1ZBW0. **Peroxisome:** P17336, Q9VUL8. **Ribosome:** P41094, P50887, Q9VVU2, P41093, Q9VTP4, P48159, Q9W229, P38979, P38979, Q9V9M7, P55841, P55830, P04359, P80455, O16797, P29327, P09180, P09180, Q9W1B9, Q9V3G1, Q9V3G1, P17704, Q0E9B6, Q0E9B6, Q9VNB9

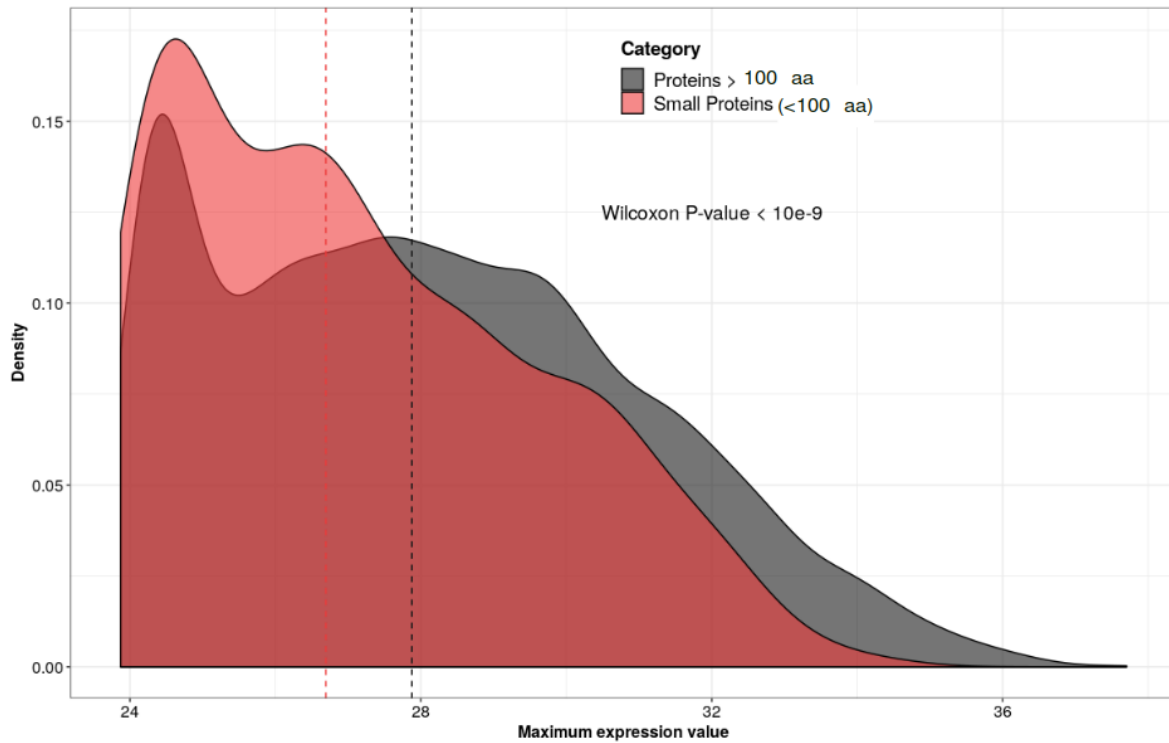

**Supplemental Figure S10: Comparison of LFQ expression levels of detected protein groups that are shorter (small proteins n=308) or longer than 100 amino acids (n=5965).** Density plot describes the distribution of maximum protein expression levels detected in our assay.

## Supplemental Table S1: Read representation statistics of the Trinity assembly

### General bowtie2 alignment statistics

164204260 reads; of these:

164,204,260 (100.00%) were paired; of these:

6,910,436 (4.21%) aligned concordantly 0 times

32,754,566 (19.95%) aligned concordantly exactly 1 time

124,539,258 (75.84%) aligned concordantly >1 times

----

6,910,436 pairs aligned concordantly 0 times; of these:

222,380 (3.22%) aligned discordantly 1 time

----

6,688,056 pairs aligned 0 times concordantly or discordantly; of these:

13,376,112 mates make up the pairs; of these:

5,520,530 (41.27%) aligned 0 times

1,518,998 (11.36%) aligned exactly 1 time

6,336,584 (47.37%) aligned >1 times

**98.32% overall alignment rate**

### Stats for aligned rna-seq fragments (note, not counting those frags where neither left/right read aligned)

162139814 aligned fragments; of these:

162139814 were paired; of these:

4845990 aligned concordantly 0 times

157293824 aligned concordantly exactly 1 time

0 aligned concordantly >1 times

----

4845990 pairs aligned concordantly 0 times; of these:

3454352 aligned as improper pairs

1391638 pairs had only one fragment end align to one or more contigs; of these:

1092884 fragments had only the left /1 read aligned; of these:

1092884 left reads mapped uniquely

0 left reads mapped >1 times

298754 fragments had only the right /2 read aligned; of these:

298754 right reads mapped uniquely

0 right reads mapped >1 times

**Overall, 97.01% of aligned fragments aligned as proper pairs**

**Supplemental Table S2: Expression bins and transcripts lengths**

| Expression percentile | ExN50 (median length (bases) of transcripts in expression perc bin) | # transcripts |
|-----------------------|---------------------------------------------------------------------|---------------|
| 3                     | 791                                                                 | 1             |
| 5                     | 791                                                                 | 2             |
| 8                     | 791                                                                 | 3             |
| 10                    | 335                                                                 | 4             |
| 13                    | 335                                                                 | 5             |
| 15                    | 335                                                                 | 6             |
| 16                    | 791                                                                 | 7             |
| 17                    | 791                                                                 | 8             |
| 18                    | 586                                                                 | 10            |
| 19                    | 586                                                                 | 11            |
| 20                    | 791                                                                 | 13            |
| 21                    | 791                                                                 | 15            |
| 22                    | 791                                                                 | 18            |
| 23                    | 586                                                                 | 20            |
| 24                    | 682                                                                 | 23            |
| 25                    | 586                                                                 | 26            |
| 26                    | 586                                                                 | 30            |
| 27                    | 526                                                                 | 33            |
| 28                    | 604                                                                 | 37            |
| 29                    | 586                                                                 | 41            |
| 30                    | 604                                                                 | 45            |
| 31                    | 645                                                                 | 49            |
| 32                    | 682                                                                 | 54            |
| 33                    | 829                                                                 | 59            |
| 34                    | 959                                                                 | 64            |
| 35                    | 959                                                                 | 70            |
| 36                    | 981                                                                 | 76            |
| 37                    | 1004                                                                | 83            |
| 38                    | 1004                                                                | 90            |
| 39                    | 981                                                                 | 98            |
| 40                    | 1024                                                                | 106           |
| 41                    | 1037                                                                | 115           |
| 42                    | 1057                                                                | 125           |
| 43                    | 1123                                                                | 137           |
| 44                    | 1221                                                                | 149           |
| 45                    | 1181                                                                | 163           |
| 46                    | 1228                                                                | 178           |
| 47                    | 1229                                                                | 195           |
| 48                    | 1320                                                                | 215           |
| 49                    | 1392                                                                | 238           |
| 50                    | 1530                                                                | 264           |
| 51                    | 1525                                                                | 295           |
| 52                    | 1503                                                                | 330           |
| 53                    | 1604                                                                | 370           |
| 54                    | 1660                                                                | 416           |

| Expression percentile | ExN50 (median length (bases) of transcripts in expression perc group) | # transcripts |
|-----------------------|-----------------------------------------------------------------------|---------------|
| 55                    | 1727                                                                  | 472           |
| 56                    | 1724                                                                  | 535           |
| 57                    | 1724                                                                  | 609           |
| 58                    | 1759                                                                  | 692           |
| 59                    | 1832                                                                  | 785           |
| 60                    | 1836                                                                  | 890           |
| 61                    | 1896                                                                  | 1008          |
| 62                    | 1944                                                                  | 1141          |
| 63                    | 1945                                                                  | 1289          |
| 64                    | 1966                                                                  | 1456          |
| 65                    | 2024                                                                  | 1641          |
| 66                    | 2054                                                                  | 1844          |
| 67                    | 2092                                                                  | 2068          |
| 68                    | 2132                                                                  | 2315          |
| 69                    | 2166                                                                  | 2588          |
| 70                    | 2163                                                                  | 2889          |
| 71                    | 2188                                                                  | 3221          |
| 72                    | 2200                                                                  | 3590          |
| 73                    | 2225                                                                  | 3993          |
| 74                    | 2227                                                                  | 4439          |
| 75                    | 2225                                                                  | 4930          |
| 76                    | 2266                                                                  | 5471          |
| 77                    | 2284                                                                  | 6071          |
| 78                    | 2322                                                                  | 6737          |
| 79                    | 2337                                                                  | 7476          |
| 80                    | 2352                                                                  | 8297          |
| 81                    | 2356                                                                  | 9212          |
| 82                    | 2353                                                                  | 10244         |
| <b>83</b>             | <b>2356</b>                                                           | <b>11414</b>  |
| 84                    | 2354                                                                  | 12751         |
| 85                    | 2353                                                                  | 14291         |
| 86                    | 2342                                                                  | 16072         |
| 87                    | 2332                                                                  | 18181         |
| 88                    | 2317                                                                  | 20718         |
| 89                    | 2279                                                                  | 23817         |
| <b>90</b>             | <b>2270</b>                                                           | <b>27688</b>  |
| 91                    | 2232                                                                  | 32659         |
| 92                    | 2189                                                                  | 39193         |
| 93                    | 2115                                                                  | 47777         |
| 94                    | 2033                                                                  | 58804         |
| 95                    | 1931                                                                  | 72524         |
| 96                    | 1816                                                                  | 89225         |
| 97                    | 1686                                                                  | 109447        |
| 98                    | 1547                                                                  | 134574        |
| 100                   | 1553                                                                  | 186401        |

### Supplemental Table S3. TransRate analysis results

| assembly              | Trinity.fasta |
|-----------------------|---------------|
| n_seqs                | 186,401       |
| smallest              | 201           |
| largest               | 20,434        |
| n_bases               | 158,589,380   |
| mean_len              | 850.80        |
| n_under_200           | 0             |
| n_over_1k             | 44,509        |
| n_over_10k            | 103           |
| n_with_orf            | 34,345        |
| mean_orf_percent      | 45.31         |
| n90                   | 317           |
| n70                   | 761           |
| n50                   | 1,553         |
| n30                   | 2,608         |
| n10                   | 4,771         |
| gc                    | 0.39          |
| bases_n               | 0             |
| proportion_n          | 0             |
| fragments             | 164,204,260   |
| fragments_mapped      | 140,021,124   |
| p_fragments_mapped    | 0.85          |
| good_mappings         | 119,452,817   |
| p_good_mapping        | 0.73          |
| bad_mappings          | 20,568,307    |
| potential_bridges     | 78,186        |
| bases_uncovered       | 21,535,350    |
| p_bases_uncovered     | 0.14          |
| contigs_uncoverbase   | 86,782        |
| p_contigs_uncoverbase | 0.47          |
| contigs_uncovered     | 16,022        |
| p_contigs_uncovered   | 0.09          |
| contigs_lowcovered    | 117,167       |
| p_contigs_lowcovered  | 0.63          |
| contigs_segmented     | 15,615        |
| p_contigs_segmented   | 0.08          |
| CRBB_hits             | 33,518        |
| n_contigs_with_CRBB   | 33,518        |
| p_contigs_with_CRBB   | 0.18          |
| rbh_per_reference     | 1.49          |
| n_refs_with_CRBB      | 12,564        |
| p_refs_with_CRBB      | 0.56          |
| cov25                 | 11,476        |
| p_cov25               | 0.51          |
| cov50                 | 10,224        |
| p_cov50               | 0.45          |
| cov75                 | 8,756         |
| p_cov75               | 0.39          |
| cov85                 | 8,040         |
| p_cov85               | 0.36          |
| cov95                 | 7,190         |
| p_cov95               | 0.32          |
| reference_coverage    | 0.44          |
| <b>score</b>          | <b>0.31</b>   |
| optimal_score         | 0.41          |
| cutoff                | 0.04          |
| weighted              | 0.54          |

## Supplemental Table S4. BUSCO analysis results

BUSCO version is: 2.0 beta 2

The lineage dataset is: arthropoda\_odb9

BUSCO was run in mode: proteins

**C:94.8%**[S:45.6%,D:49.2%],F:2.1%,M:3.1%,n:1066

|      |                                     |
|------|-------------------------------------|
| 1011 | Complete BUSCOs (C)                 |
| 486  | Complete and single-copy BUSCOs (S) |
| 525  | Complete and duplicated BUSCOs (D)  |
| 22   | Fragmented BUSCOs (F)               |
| 33   | Missing BUSCOs (M)                  |
| 1066 | Total BUSCO groups searched         |

**Supplemental Table S5. *Bombyx mori* NCBI-BmN4 and SilkBase-BmN4 variome**

| Genome                                                                      | CDS <i>Bombyx mori</i><br>NCBI | CDS <i>Bombyx mori</i> SilkBase |
|-----------------------------------------------------------------------------|--------------------------------|---------------------------------|
| <b>SnEff version</b>                                                        | SnEff 4.3t                     | SnEff 4.3t                      |
| <b>Number of lines (input file)</b>                                         | 125,939                        | 186,952                         |
| <b>Number of multi-allelic VCF entries<br/>(i.e. more than two alleles)</b> | 361                            | 582                             |
| <b>Number of effects</b>                                                    | 126,300                        | 187,534                         |
| <b>Genome total length</b>                                                  | 36,783,937                     | 26,184,828                      |
| <b>Genome effective length</b>                                              | 16,393,027                     | 19,826,985                      |
| <b>Variant rate</b>                                                         | 1 variant every 129 bases      | 1 variant every 105 bases       |

**Number variants by type**

| Type            | NCBI    |         | SilkBase |         |
|-----------------|---------|---------|----------|---------|
|                 | Total   | Percent | Total    | Percent |
| <b>SNP</b>      | 124,041 | 98.21%  | 184,303  | 98.28%  |
| <b>MNP</b>      | 0       | 0.00%   | 0        | 0.00%   |
| <b>INS</b>      | 1,287   | 1.02%   | 1,547    | 0.82%   |
| <b>DEL</b>      | 972     | 0.77%   | 1,684    | 0.90%   |
| <b>MIXED</b>    | 0       | 0.00%   | 0        | 0.00%   |
| <b>INV</b>      | 0       | 0.00%   | 0        | 0.00%   |
| <b>DUP</b>      | 0       | 0.00%   | 0        | 0.00%   |
| <b>BND</b>      | 0       | 0.00%   | 0        | 0.00%   |
| <b>INTERVAL</b> | 0       | 0.00%   | 0        | 0.00%   |
| <b>Sum</b>      | 126,300 |         | 187,534  |         |

**Number of effects by impact**

| Type (alphabetical order) | NCBI    |         | SilkBase |         |
|---------------------------|---------|---------|----------|---------|
|                           | Count   | Percent | Count    | Percent |
| <b>HIGH</b>               | 2,053   | 1.62%   | 2,986    | 1.59%   |
| <b>LOW</b>                | 93,155  | 73.75%  | 136,664  | 72.87%  |
| <b>MODERATE</b>           | 31,092  | 24.61%  | 47,884   | 25.53%  |
| <b>Sum</b>                | 126,300 |         | 187,534  |         |



**Number of effects of SNP by functional class**

| Type (alphabetical order) | NCBI    |         | SilkBase |         |
|---------------------------|---------|---------|----------|---------|
|                           | Count   | Percent | Count    | Percent |
| MISSENSE                  | 30,541  | 24.62%  | 46,793   | 25.39%  |
| NONSENSE                  | 345     | 0.28%   | 846      | 0.46%   |
| SILENT                    | 93,155  | 75.1%   | 136,664  | 74.15%  |
| Sum                       | 124,041 |         | 184,303  |         |

**Number of effects by type and region**

| Type (alphabetical order)      | NCBI   |         | SilkBase |         |
|--------------------------------|--------|---------|----------|---------|
|                                | Count  | Percent | Count    | Percent |
| conservative_inframe_deletion  | 124    | 0.09%   | 219      | 0.12%   |
| conservative_inframe_insertion | 92     | 0.07%   | 181      | 0.1%    |
| disruptive_inframe_deletion    | 225    | 0.17%   | 401      | 0.21%   |
| disruptive_inframe_insertion   | 176    | 0.13%   | 323      | 0.17%   |
| frameshift_variant             | 1,642  | 1.29%   | 2,107    | 1.12%   |
| missense_variant               | 30,484 | 24.12%  | 46,774   | 24.93%  |
| splice_region_variant          | 10     | 0.008%  | 17       | 0.01%   |
| stop_gained                    | 395    | 0.31%   | 918      | 0.49%   |
| stop_lost                      | 62     | 0.05%   | 19       | 0.01%   |
| synonymous_variant             | 93,146 | 73.71%  | 136,664  | 72.84%  |

## Supplemental Table S6. Statistics of correspondence and differences between genome-free (BOMOPTA) and SilkBase annotations

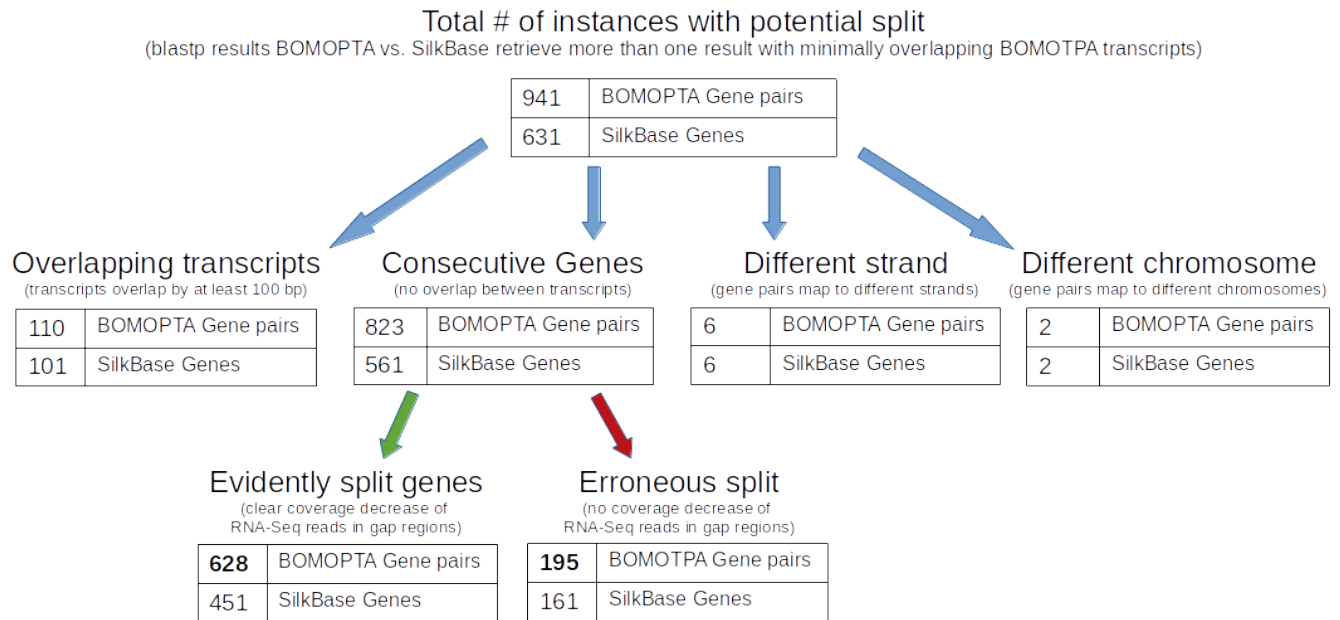

**Supplemental Table S7. Table including enrichment values for all clusters and all cellular localization categories**

| Cluster_ID | Annotation_Category | No. genes in cluster and category | No. genes not in cluster and in category | No. genes in cluster and not in category | No. genes not in cluster and not in category | p.value  | fold_change | p.value_adj |
|------------|---------------------|-----------------------------------|------------------------------------------|------------------------------------------|----------------------------------------------|----------|-------------|-------------|
| cluster_1  | TmHMM               | 124                               | 618                                      | 575                                      | 3423                                         | 5.8E-02  | 1.19        | 2.3E-01     |
| cluster_1  | signalP             | 13                                | 268                                      | 686                                      | 3773                                         | 1.0E+00  | 0.27        | 1.0E+00     |
| cluster_1  | Lysosome_cc         | 3                                 | 44                                       | 696                                      | 3997                                         | 9.8E-01  | 0.39        | 1.0E+00     |
| cluster_1  | Peroxisome_cc       | 3                                 | 27                                       | 696                                      | 4014                                         | 8.4E-01  | 0.64        | 1.0E+00     |
| cluster_1  | Golgi_cc            | 2                                 | 108                                      | 697                                      | 3933                                         | 1.0E+00  | 0.10        | 1.0E+00     |
| cluster_1  | Nucleus_cc          | 20                                | 658                                      | 679                                      | 3383                                         | 1.0E+00  | 0.15        | 1.0E+00     |
| cluster_1  | Chromatin_cc        | 6                                 | 48                                       | 693                                      | 3993                                         | 8.3E-01  | 0.72        | 1.0E+00     |
| cluster_1  | ER_cc               | 1                                 | 96                                       | 698                                      | 3945                                         | 1.0E+00  | 0.06        | 1.0E+00     |
| cluster_1  | Mitochondrion_cc    | 301                               | 84                                       | 398                                      | 3957                                         | 5.1E-197 | 35.56       | 4.1E-195    |
| cluster_1  | Ribosomes           | 2                                 | 81                                       | 697                                      | 3960                                         | 1.0E+00  | 0.14        | 1.0E+00     |
| cluster_2  | TmHMM               | 212                               | 530                                      | 291                                      | 3707                                         | 7.2E-53  | 5.09        | 1.9E-51     |
| cluster_2  | signalP             | 103                               | 178                                      | 400                                      | 4059                                         | 1.3E-33  | 5.87        | 2.0E-32     |
| cluster_2  | Lysosome_cc         | 15                                | 32                                       | 488                                      | 4205                                         | 5.9E-05  | 4.04        | 3.4E-04     |
| cluster_2  | Peroxisome_cc       | 22                                | 8                                        | 481                                      | 4229                                         | 6.3E-16  | 24.14       | 6.3E-15     |
| cluster_2  | Golgi_cc            | 15                                | 95                                       | 488                                      | 4142                                         | 1.9E-01  | 1.34        | 6.2E-01     |
| cluster_2  | Nucleus_cc          | 17                                | 661                                      | 486                                      | 3576                                         | 1.0E+00  | 0.19        | 1.0E+00     |
| cluster_2  | Chromatin_cc        | 4                                 | 50                                       | 499                                      | 4187                                         | 8.4E-01  | 0.67        | 1.0E+00     |
| cluster_2  | ER_cc               | 26                                | 71                                       | 477                                      | 4166                                         | 5.0E-06  | 3.20        | 3.3E-05     |
| cluster_2  | Mitochondrion_cc    | 12                                | 373                                      | 491                                      | 3864                                         | 1.0E+00  | 0.25        | 1.0E+00     |
| cluster_2  | Ribosomes           | 1                                 | 82                                       | 502                                      | 4155                                         | 1.0E+00  | 0.10        | 1.0E+00     |
| cluster_3  | TmHMM               | 312                               | 430                                      | 337                                      | 3661                                         | 8.0E-103 | 7.88        | 3.2E-101    |
| cluster_3  | signalP             | 135                               | 146                                      | 514                                      | 3945                                         | 2.2E-47  | 7.09        | 4.4E-46     |
| cluster_3  | Lysosome_cc         | 13                                | 34                                       | 636                                      | 4057                                         | 8.5E-03  | 2.44        | 4.0E-02     |
| cluster_3  | Peroxisome_cc       | 2                                 | 28                                       | 647                                      | 4063                                         | 9.3E-01  | 0.45        | 1.0E+00     |
| cluster_3  | Golgi_cc            | 23                                | 87                                       | 626                                      | 4004                                         | 2.3E-02  | 1.69        | 9.6E-02     |
| cluster_3  | Nucleus_cc          | 22                                | 656                                      | 627                                      | 3435                                         | 1.0E+00  | 0.18        | 1.0E+00     |
| cluster_3  | Chromatin_cc        | 3                                 | 51                                       | 646                                      | 4040                                         | 9.8E-01  | 0.37        | 1.0E+00     |
| cluster_3  | ER_cc               | 33                                | 64                                       | 616                                      | 4027                                         | 2.2E-07  | 3.37        | 1.6E-06     |
| cluster_3  | Mitochondrion_cc    | 3                                 | 382                                      | 646                                      | 3709                                         | 1.0E+00  | 0.05        | 1.0E+00     |
| cluster_3  | Ribosomes           | 1                                 | 82                                       | 648                                      | 4009                                         | 1.0E+00  | 0.08        | 1.0E+00     |
| cluster_4  | TmHMM               | 57                                | 685                                      | 310                                      | 3688                                         | 5.5E-01  | 0.99        | 1.0E+00     |
| cluster_4  | signalP             | 15                                | 266                                      | 352                                      | 4107                                         | 9.6E-01  | 0.66        | 1.0E+00     |
| cluster_4  | Lysosome_cc         | 4                                 | 43                                       | 363                                      | 4330                                         | 5.0E-01  | 1.11        | 1.0E+00     |
| cluster_4  | Peroxisome_cc       | 1                                 | 29                                       | 366                                      | 4344                                         | 9.1E-01  | 0.41        | 1.0E+00     |
| cluster_4  | Golgi_cc            | 21                                | 89                                       | 346                                      | 4284                                         | 8.0E-05  | 2.92        | 4.3E-04     |
| cluster_4  | Nucleus_cc          | 46                                | 632                                      | 321                                      | 3741                                         | 8.6E-01  | 0.85        | 1.0E+00     |
| cluster_4  | Chromatin_cc        | 3                                 | 51                                       | 364                                      | 4322                                         | 8.0E-01  | 0.70        | 1.0E+00     |
| cluster_4  | ER_cc               | 6                                 | 91                                       | 361                                      | 4282                                         | 7.7E-01  | 0.78        | 1.0E+00     |
| cluster_4  | Mitochondrion_cc    | 12                                | 373                                      | 355                                      | 4000                                         | 1.0E+00  | 0.36        | 1.0E+00     |
| cluster_4  | Ribosomes           | 1                                 | 82                                       | 366                                      | 4291                                         | 1.0E+00  | 0.14        | 1.0E+00     |
| cluster_5  | TmHMM               | 8                                 | 734                                      | 504                                      | 3494                                         | 1.0E+00  | 0.08        | 1.0E+00     |
| cluster_5  | signalP             | 2                                 | 279                                      | 510                                      | 3949                                         | 1.0E+00  | 0.06        | 1.0E+00     |
| cluster_5  | Lysosome_cc         | 5                                 | 42                                       | 507                                      | 4186                                         | 5.8E-01  | 0.98        | 1.0E+00     |
| cluster_5  | Peroxisome_cc       | 1                                 | 29                                       | 511                                      | 4199                                         | 9.7E-01  | 0.28        | 1.0E+00     |
| cluster_5  | Golgi_cc            | 17                                | 93                                       | 495                                      | 4135                                         | 8.0E-02  | 1.53        | 3.1E-01     |
| cluster_5  | Nucleus_cc          | 107                               | 571                                      | 405                                      | 3657                                         | 1.1E-05  | 1.69        | 6.5E-05     |
| cluster_5  | Chromatin_cc        | 9                                 | 45                                       | 503                                      | 4183                                         | 1.2E-01  | 1.66        | 4.5E-01     |
| cluster_5  | ER_cc               | 10                                | 87                                       | 502                                      | 4141                                         | 6.1E-01  | 0.95        | 1.0E+00     |
| cluster_5  | Mitochondrion_cc    | 10                                | 375                                      | 502                                      | 3853                                         | 1.0E+00  | 0.20        | 1.0E+00     |
| cluster_5  | Ribosomes           | 47                                | 36                                       | 465                                      | 4192                                         | 5.5E-25  | 11.76       | 7.3E-24     |
| cluster_6  | TmHMM               | 2                                 | 740                                      | 380                                      | 3618                                         | 1.0E+00  | 0.03        | 1.0E+00     |
| cluster_6  | signalP             | 3                                 | 278                                      | 379                                      | 4080                                         | 1.0E+00  | 0.12        | 1.0E+00     |
| cluster_6  | Lysosome_cc         | 2                                 | 45                                       | 380                                      | 4313                                         | 9.0E-01  | 0.50        | 1.0E+00     |
| cluster_6  | Peroxisome_cc       | 1                                 | 29                                       | 381                                      | 4329                                         | 9.2E-01  | 0.39        | 1.0E+00     |
| cluster_6  | Golgi_cc            | 11                                | 99                                       | 371                                      | 4259                                         | 2.7E-01  | 1.28        | 8.7E-01     |
| cluster_6  | Nucleus_cc          | 108                               | 570                                      | 274                                      | 3788                                         | 8.4E-14  | 2.62        | 7.5E-13     |
| cluster_6  | Chromatin_cc        | 11                                | 43                                       | 371                                      | 4315                                         | 3.2E-03  | 2.97        | 1.6E-02     |
| cluster_6  | ER_cc               | 6                                 | 91                                       | 376                                      | 4267                                         | 8.1E-01  | 0.75        | 1.0E+00     |
| cluster_6  | Mitochondrion_cc    | 3                                 | 382                                      | 379                                      | 3976                                         | 1.0E+00  | 0.08        | 1.0E+00     |
| cluster_6  | Ribosomes           | 30                                | 53                                       | 352                                      | 4305                                         | 3.4E-13  | 6.92        | 2.7E-12     |
| cluster_7  | TmHMM               | 3                                 | 739                                      | 350                                      | 3648                                         | 1.0E+00  | 0.04        | 1.0E+00     |
| cluster_7  | signalP             | 6                                 | 275                                      | 347                                      | 4112                                         | 1.0E+00  | 0.26        | 1.0E+00     |
| cluster_7  | Lysosome_cc         | 2                                 | 45                                       | 351                                      | 4342                                         | 8.8E-01  | 0.55        | 1.0E+00     |
| cluster_7  | Peroxisome_cc       | 1                                 | 29                                       | 352                                      | 4358                                         | 9.0E-01  | 0.43        | 1.0E+00     |
| cluster_7  | Golgi_cc            | 4                                 | 106                                      | 349                                      | 4281                                         | 9.7E-01  | 0.46        | 1.0E+00     |
| cluster_7  | Nucleus_cc          | 113                               | 565                                      | 240                                      | 3822                                         | 6.7E-19  | 3.18        | 7.6E-18     |
| cluster_7  | Chromatin_cc        | 9                                 | 45                                       | 344                                      | 4342                                         | 1.7E-02  | 2.52        | 7.5E-02     |
| cluster_7  | ER_cc               | 4                                 | 93                                       | 349                                      | 4294                                         | 9.4E-01  | 0.53        | 1.0E+00     |
| cluster_7  | Mitochondrion_cc    | 6                                 | 379                                      | 347                                      | 4008                                         | 1.0E+00  | 0.18        | 1.0E+00     |
| cluster_7  | Ribosomes           | 2                                 | 81                                       | 351                                      | 4306                                         | 9.9E-01  | 0.30        | 1.0E+00     |
| cluster_8  | TmHMM               | 7                                 | 735                                      | 485                                      | 3513                                         | 1.0E+00  | 0.07        | 1.0E+00     |
| cluster_8  | signalP             | 3                                 | 278                                      | 489                                      | 3970                                         | 1.0E+00  | 0.09        | 1.0E+00     |
| cluster_8  | Lysosome_cc         | 6                                 | 41                                       | 486                                      | 4207                                         | 3.6E-01  | 1.27        | 1.0E+00     |
| cluster_8  | Peroxisome_cc       | 4                                 | 26                                       | 488                                      | 4222                                         | 3.8E-01  | 1.33        | 1.0E+00     |
| cluster_8  | Golgi_cc            | 7                                 | 103                                      | 485                                      | 4145                                         | 9.5E-01  | 0.58        | 1.0E+00     |
| cluster_8  | Nucleus_cc          | 79                                | 599                                      | 413                                      | 3649                                         | 1.4E-01  | 1.17        | 4.7E-01     |
| cluster_8  | Chromatin_cc        | 3                                 | 51                                       | 489                                      | 4197                                         | 9.3E-01  | 0.50        | 1.0E+00     |
| cluster_8  | ER_cc               | 6                                 | 91                                       | 486                                      | 4157                                         | 9.5E-01  | 0.56        | 1.0E+00     |
| cluster_8  | Mitochondrion_cc    | 21                                | 364                                      | 471                                      | 3884                                         | 1.0E+00  | 0.48        | 1.0E+00     |
| cluster_8  | Ribosomes           | 2                                 | 81                                       | 490                                      | 4167                                         | 1.0E+00  | 0.21        | 1.0E+00     |

### Supplemental Table S8. Mycoplasma contamination assay

| Mycoplasma species              | No. of Q20 mapped reads | No. of the M. mapped reads that re-map to SilkBase bombyx mori genome | Percentage of 160 M reads |
|---------------------------------|-------------------------|-----------------------------------------------------------------------|---------------------------|
| <i>A.laidlawii</i>              | 7                       | 0                                                                     | 0.0000043750              |
| <i>M.arginini</i>               | 97                      | 0                                                                     | 0.0000606250              |
| <i>M.fermentans</i>             | 427                     | 0                                                                     | 0.0002668750              |
| <i>M.hominis</i>                | 0                       | 0                                                                     | 0.0000000000              |
| <i>M.hyorinis</i>               | 256                     | 0                                                                     | 0.0001600000              |
| <i>M. orale</i>                 | 94                      | 0                                                                     | 0.0000587500              |
| All Mycoplasma species combined | 223                     | 0                                                                     | 0.0001393750              |

### Supplemental Table S9. Comparison of genome-free and genome-guided assembly

Assemblies were performed using the same RNA-Seq and mass spectrometry data. For the genome-guided approach the SilkBase genome was used as scaffold for read mapping.

| Parameter                                                                   | Genome-free assembly | Genome-guided assembly |
|-----------------------------------------------------------------------------|----------------------|------------------------|
| <b>Raw Trinity Assembly</b>                                                 |                      |                        |
| Read to assembled contigs alignment rate                                    | 98.32%               | 56.95%                 |
| Mean length of contigs                                                      | 850 bases            | 793 bases              |
| No. of good contigs (transrate)                                             | 172,778              | 160,865                |
| % complete BUSCOs                                                           | 94.84%               | 93.60%                 |
| # contigs with refs in silkbase (CRBB)                                      | 12564 (56%)          | 12072 (54%)            |
| % contigs with sequence coverage > 85%                                      | 36%                  | 34%                    |
| <b>Mass-Spectrometric Identification</b>                                    |                      |                        |
| Total MS/MS identified                                                      | 43.98%               | 44.11%                 |
| # protein groups identified                                                 | 6,273                | 6,125                  |
| % identified ORFs with > 80% hit percentage (genome-free vs. genome-guided) | 96%                  |                        |
| > 80% hit percentage (genome-free vs. genome-guided)                        | 220 (4%)             | 232 (4%)               |

**Supplemental Table S10. Mapping statistics of newly identified protein CDS sequences to the sequences of the female-determining chromosome W [**

| <b>Chromosome</b> | <b>No. of newly identified genes mapping to respective chromosome</b> | <b>Length (bp)</b> | <b>Gene per bp</b> |
|-------------------|-----------------------------------------------------------------------|--------------------|--------------------|
| BMSK_chr1         | 2                                                                     | 21484951           | 9.31E-08           |
| BMSK_chr2         | 4                                                                     | 8686177            | 2.30E-07           |
| BMSK_chr3         | 6                                                                     | 15247601           | 1.31E-07           |
| BMSK_chr4         | 3                                                                     | 19249693           | 1.04E-07           |
| BMSK_chr5         | 9                                                                     | 19440377           | 1.03E-07           |
| BMSK_chr6         | 5                                                                     | 17184971           | 1.16E-07           |
| BMSK_chr7         | 4                                                                     | 14081139           | 1.42E-07           |
| BMSK_chr8         | 7                                                                     | 16207405           | 1.23E-07           |
| BMSK_chr9         | 6                                                                     | 17323741           | 1.15E-07           |
| BMSK_chr10        | 5                                                                     | 17823796           | 1.12E-07           |
| BMSK_chr11        | 16                                                                    | 20585495           | 9.72E-08           |
| BMSK_chr12        | 10                                                                    | 17604390           | 1.14E-07           |
| BMSK_chr13        | 5                                                                     | 17827900           | 1.12E-07           |
| BMSK_chr14        | 2                                                                     | 13351588           | 1.50E-07           |
| BMSK_chr15        | 12                                                                    | 18484841           | 1.08E-07           |
| BMSK_chr16        | 7                                                                     | 14645837           | 1.37E-07           |
| BMSK_chr17        | 6                                                                     | 18863447           | 1.06E-07           |
| BMSK_chr18        | 3                                                                     | 16364595           | 1.22E-07           |
| BMSK_chr19        | 5                                                                     | 14821947           | 1.35E-07           |
| BMSK_chr20        | 4                                                                     | 12398063           | 1.61E-07           |
| BMSK_chr21        | 4                                                                     | 15391065           | 1.30E-07           |
| BMSK_chr22        | 6                                                                     | 18374771           | 1.09E-07           |
| BMSK_chr23        | 4                                                                     | 21411059           | 9.34E-08           |
| BMSK_chr24        | 5                                                                     | 19152483           | 1.04E-07           |
| BMSK_chr25        | 5                                                                     | 15122178           | 1.32E-07           |
| BMSK_chr26        | 4                                                                     | 11692837           | 1.71E-07           |
| BMSK_chr27        | 1                                                                     | 11124593           | 1.80E-07           |
| BMSK_chr28        | 4                                                                     | 10763069           | 1.86E-07           |
